# Supplementary material
Source: PubMed Central journal article supplement (PMC3697575)
Supplement: AEM.00537-13_zam013134488so1.pdf [file AEM.00537-13_zam013134488so1.pdf]

1 **Table S1.** Primers used in this study for amplification of the virulence factors of pathotypes of *Escherichia coli*

| Virulence factor        | Primers            | Pathotype | T <sub>a</sub> (°C) <sup>a</sup> | Amplicon (bp) | Oligonucleotide sequence (5'--> 3') | Reference  |
|-------------------------|--------------------|-----------|----------------------------------|---------------|-------------------------------------|------------|
| β-D-GUD                 | <i>uidA</i> -F     | All       | 55                               | 168           | TGTGCCRGGMAGTTTTAAC                 | this study |
|                         | <i>uidA</i> -R     |           |                                  |               | TGATTATTKACCCACACTTTG               |            |
| Shiga toxin 1           | <i>stx1</i> -F     | EHEC      | 55                               | 107           | GCAAAGAMGTATGTWGATTTCG              | this study |
|                         | <i>stx1</i> -R     |           |                                  |               | GWGCCACTATCAATCATCAG                |            |
| Shiga toxin 2           | <i>stx2</i> -F     | EHEC      | 55                               | 82            | AATGCAAATCAGTCGTCAC                 | this study |
|                         | <i>stx2</i> -R     |           |                                  |               | TGCATCTCTGGTCATTGTAT                |            |
| Shiga toxin 2 (variant) | <i>stx2</i> -F var | EHEC      | 55                               | 82            | GATGCAGATRRKCGYCAT                  | this study |
|                         | <i>stx2</i> -R var |           |                                  |               | TGATGCGCGGGTCATGGAAC                |            |
| Intimin                 | <i>eae</i> -F      | EHEC/EPEC | 52                               | 92            | GCTATAACRTCTTCATTGATC               | this study |
|                         | <i>eae</i> -R      |           |                                  |               | RCTACTTTTTRAAATAGTCTCG              |            |
| Enterohaemolysin        | <i>ehxA</i> -F     | EHEC/EPEC | 55                               | 86            | GCACCACAACCTTGAYAAACT               | this study |
|                         | <i>ehxA</i> -R     |           |                                  |               | CCAGATTATTACCTACATTYTCAG            |            |
| ST                      | <i>est</i> -F      | ETEC      | 54                               | 69/72         | TGAAAGCATGAATRGTAGCAA               | this study |
|                         | <i>est</i> -R      |           |                                  |               | TTAATAACATSSAGCACAGG                |            |
| ST variant              | <i>est</i> -F var  | ETEC      | 54                               | 69/73         | TCAGAAAATATGAAYAACACATT             | this study |
|                         | <i>est</i> -R var  |           |                                  |               | TAATAGCACCCGGTACAAG                 |            |

|                                       |                               |      |    |     |                          |            |
|---------------------------------------|-------------------------------|------|----|-----|--------------------------|------------|
| LT                                    | <i>elt</i> -F                 | ETEC | 54 | 142 | GGYAAAAGAGAAATGGTTAT     | this study |
|                                       | <i>elt</i> -R                 |      |    |     | TCTCGGTCAGATATGYGATTC    |            |
| Bundle- forming pilus ( <i>bfpA</i> ) | <i>bfpA</i> -F                | EPEC | 53 | 109 | CMGGTGTGATGTTTTACTAC     | this study |
|                                       | <i>bfpA</i> -R                |      |    |     | TGCCCAATATACARACCAT      |            |
| Invasion plasmid ( <i>spa24</i> )     | <i>pInv</i> -F                | EIEC | 53 | 159 | CCAATCACAATATCAGTACCA    | this study |
|                                       | <i>pInv</i> -R                |      |    |     | AAAGAGCCTTATTACCCATAT    |            |
| Enteroaggregative regulator           | <i>aggR</i> -F                | EAEC | 56 | 94  | TTTATCGCAATCAGATTAARC    | this study |
|                                       | <i>aggR</i> -R                |      |    |     | GGACAACRCAAGCATCTAC      |            |
| <i>rbf</i> <sub>O157</sub>            | <i>rbf</i> <sub>O157</sub> -F | EHEC | 55 | 125 | CAAAAGGAAACTATATTCAGAAGT | (18)       |
|                                       | <i>rbf</i> <sub>O157</sub> -R |      |    |     | CGATATACCTAACGCTAACAA    |            |
| <i>fliC</i> <sub>H7</sub>             | <i>fliC</i> <sub>H7</sub> -F  | EHEC | 55 | 91  | CGACAGGTCTTTATGATCTGA    | (18)       |
|                                       | <i>fliC</i> <sub>H7</sub> -R  |      |    |     | ACTGTGACTTTATCGCCATT     |            |
| <i>wzx</i> <sub>O104</sub>            | <i>wzx</i> <sub>O104</sub> -F | EAEC | 55 | 99  | GCGCAAAGAATTTCAACTT      | (19)       |
|                                       | <i>wzx</i> <sub>O104</sub> -R |      |    |     | TGTAAAATCCTTTAAACTATACG  |            |
| <i>fliC</i> <sub>H4</sub>             | <i>fliC</i> <sub>H4</sub> -F  | EAEC | 55 | 192 | CTGGGGGTAAACAAGTCAA      | (19)       |
|                                       | <i>fliC</i> <sub>H4</sub> -R  |      |    |     | CCAGTGCTTTTAACGGATC      |            |

2 <sup>a</sup> T<sub>a</sub>, annealing temperature.

3

4 **Table S2.** Antimicrobial resistance rates found in *Escherichia coli* isolates depending on the host species.

| Antimicrobial   | Concentration range<br>(mg/L) | Cut-off <sup>a</sup> | Pigs                                             |      | Broiler                |      | Cattle                 |      |                    |      |
|-----------------|-------------------------------|----------------------|--------------------------------------------------|------|------------------------|------|------------------------|------|--------------------|------|
|                 |                               |                      | Non-O157:H7 <sup>b</sup><br>(n=278) <sup>c</sup> |      | Non-O157:H7<br>(n=196) |      | Non-O157:H7<br>(n=256) |      | O157:H7<br>(n= 50) |      |
|                 |                               |                      | NR                                               | %R   | NR                     | %R   | NR                     | %R   | NR                 | %R   |
| Ampicillin      | 0.5-32                        | 8                    | 192                                              | 69.1 | 139                    | 70.9 | 40                     | 15.6 | 17                 | 34.0 |
| Cefotaxime      | 0.06-4                        | 0.25                 | 3                                                | 1.1  | 51                     | 26.0 | 0                      | 0.0  | 0                  | 0.0  |
| Ceftazidime     | 0.25-16                       | 0.5                  | 4                                                | 1.4  | 45                     | 23.0 | 0                      | 0.0  | 0                  | 0.0  |
| Nalidixic Acid  | 4-64                          | 16                   | 51                                               | 18.3 | 164                    | 83.7 | 8                      | 3.1  | 17                 | 34.0 |
| Ciprofloxacin   | 0.008-8                       | 0.06                 | 81                                               | 29.1 | 169                    | 86.2 | 9                      | 3.5  | 17                 | 34.0 |
| Streptomycin    | 2-128                         | 16                   | 211                                              | 75.9 | 133                    | 67.9 | 91                     | 35.5 | 32                 | 64.0 |
| Kanamycin       | 4-128                         | 8                    | 45                                               | 16.2 | 24                     | 12.2 | 7                      | 2.7  | 13                 | 26.0 |
| Gentamicin      | 0.25-32                       | 2                    | 20                                               | 7.2  | 20                     | 10.2 | 8                      | 3.1  | 17                 | 34.0 |
| Chloramphenicol | 2-64                          | 16                   | 76                                               | 27.3 | 37                     | 18.9 | 25                     | 9.8  | 18                 | 36.0 |
| Florphenicol    | 2-64                          | 16                   | 5                                                | 1.8  | 1                      | 0.5  | 15                     | 5.9  | 1                  | 2.0  |

|              |        |    |     |      |     |      |     |      |    |      |
|--------------|--------|----|-----|------|-----|------|-----|------|----|------|
| Tetracycline | 1-64   | 8  | 251 | 90.3 | 147 | 75.0 | 125 | 48.8 | 32 | 64.0 |
| Sulphonamide | 8-1024 | 64 | 195 | 70.1 | 105 | 53.6 | 90  | 35.2 | 32 | 64.0 |
| Trimethoprim | 0.5-32 | 2  | 198 | 71.2 | 93  | 47.4 | 45  | 17.6 | 32 | 64.0 |
| Colistin     | 2-4    | 2  | 0   | 0.0  | 0   | 0.0  | 0   | 0.0  | 0  | 0.0  |

5 Abbreviations: NR, number of resistant isolates; %R, percentage of resistant isolates; NA, Not applicable.

6 <sup>a</sup> EUCAST cut-off values ([http://www.eucast.org/mic\\_distributions/](http://www.eucast.org/mic_distributions/))

7 <sup>b</sup> Non-O157:H7: *E. coli* belonging to other serotypes different than O157:H7.

8 <sup>c</sup> For colistin in pigs only 156 isolates were tested.
